# Supplementary material
Source: PubMed Central journal article supplement (PMC6194875)
Supplement: JGMED1800060Suppl1.pdf [file JGMED1800060Suppl1.pdf]

**University of Chicago**  
**Graduate Medical Education Quality Improvement and Patient Safety Curriculum ( QSC)**  
**2016-17**

|                                                                                                                                                                                                                |                                                                                                                                                                                                                                                                                                                               |
|----------------------------------------------------------------------------------------------------------------------------------------------------------------------------------------------------------------|-------------------------------------------------------------------------------------------------------------------------------------------------------------------------------------------------------------------------------------------------------------------------------------------------------------------------------|
| <b><u>Education Leaders</u></b><br>Faculty ( <b>Internal Medicine</b> )<br>Faculty ( <b>Gen Surg</b> )<br>Fellow ( <b>Pediatrics</b> )<br>Faculty ( <b>Internal Medicine</b> )<br>Resident ( <b>Gen Surg</b> ) | <b><u>Hospital Quality Leaders</u></b><br>Vice President Risk, Patient Safety and Compliance & Chief Compliance Officer<br>Director, Risk Management & Patient Safety<br>Chief Quality Officer<br>Chief Medical Officer & Vice President for Clinical Effectiveness<br>Executive Director- Analytics, Improvement and Insight |
|----------------------------------------------------------------------------------------------------------------------------------------------------------------------------------------------------------------|-------------------------------------------------------------------------------------------------------------------------------------------------------------------------------------------------------------------------------------------------------------------------------------------------------------------------------|

### **Course Description**

The overall goal of this curriculum is to give PGY1 residents across specialties an introduction to quality improvement and patient safety. The course will focus on the knowledge necessary to assess and improve quality of care in healthcare settings. This is a foundational course intended to introduce the concepts of quality improvement and patient safety at a basic level to use as a building block for future quality and safety educational experiences during graduate medical education (GME). Residents will have the opportunity to review quality data collected from both inpatient and outpatient settings at the University of Chicago Medicine (UCM). Residents will review hospital quality data on [hospitalcompare.gov](http://hospitalcompare.gov). Residents will interact with quality leaders from across the medical center.

### **Course Objectives**

1. Residents will learn basic principles of Quality Improvement (QI)
2. Resident will learn basic principles of Patient Safety (PS)
3. Residents will understand
  - a. System Based Practice ( SBP) milestones
  - b. Practiced Based Learning and Improvement ( PBLI) Milestones
4. Resident will be introduced to the Clinical Learning Environment (CLER)
5. Residents will identify seminal papers in healthcare quality and safety
6. Residents will review hospital level clinical quality data and be able to identify areas to target for improvement
7. Residents will learn the Institute for Healthcare Improvement (IHI) model for improvement
8. Residents will identify and interact with quality leaders at UCM
9. Residents will identify patient safety issues in the hospital and learn to use event reporting
10. Residents will identify near miss and adverse events and learn Ishikawa Fishbone technique to evaluate system issues surround these events
11. Residents will review methods in proactive risk assessment in quality and safety

### **Course Location**

Each lecture will be given 3 times (open to all residents, but convenient for one group)

1. Medicine location – Wednesdays at 12:15
2. Pediatrics location - Wednesdays at 8am
3. Surgery location - Thursdays at 5pm

### **Course Website**

Most lecture materials and selected course materials will be available on the MedHub website.

**Course Overview**

|   | <u>Location</u> | <u>Lecturer</u>                            | <u>Date/Time</u>          | <u>Topic/Lecture</u> | <u>Task</u>               |
|---|-----------------|--------------------------------------------|---------------------------|----------------------|---------------------------|
| 1 | IM-             | IM faculty/ VP or Director Risk Management | October 12, 2016, 12:15pm | Patient Safety       | Fishbone                  |
| 1 | Peds            | IM faculty/ VP or Director Risk Management | October 6, 2016, 8am      | Patient Safety       | Fishbone                  |
| 1 | Surgery         | IM faculty/ VP or Director Risk Management | Sept 22, 2016, 5:15pm     | Patient Safety       | Fishbone                  |
| 2 | IM-             | Peds fellow/ Chief Quality Officer         | January 18, 2017, 12:15pm | Quality Assessment   | HospitalCompare           |
| 2 | Peds –          | Peds fellow/ Chief Quality Officer         | January 12, 2017, 8:00am  | Quality Assessment   | HospitalCompare and USNWR |
| 2 | Surgery         | Peds fellow/ Chief Quality Officer         | January 12, 2017, 5:00pm  | Quality Assessment   | HospitalCompare           |
| 3 | IM-             | Surgery Resident/Chief Medical Officer     | May 3, 2017, 12:15pm      | Quality Improvement  | PDSA worksheet            |
| 3 | Peds            | Surgery Resident/Chief Medical Officer     | April 26, 2017, 8:00am    | Quality Improvement  | PDSA worksheet            |
| 3 | Surgery         | Surgery Resident/Chief Medical Officer     | May 11, 2017, 5:00 pm     | Quality Improvement  | PDSA worksheet            |

**Lecture 1 - Patient Safety**

Topic: Pre Test (should be completed on Med Hub prior but will give 10 Min)

Introduction to Patient Safety and Risk Management ( 10 min)

Introduction to Root Cause Analysis (RCA) (10 min)

Introduction to Adverse Event/Near Miss Event and Ishikawa Fishbone Diagram ( 15min)

Residents watch video of Adverse Event and Start Ishikawa Diagram ( 15min)

Objectives:

1. Resident will be able to name leaders and purpose of UCM Department of Risk Management
2. Resident will describe difference between adverse and near miss events
3. Resident will explain principles of Root Cause Analysis (RCA)
4. Resident will regularly perform event reporting at UCM
5. Resident will demonstrate competency in completing Ishikawa Fishbone diagram to evaluate an adverse event

For Reference Only:

- a. [https://www.youtube.com/watch?v=zo\\_-AsAMMQ0](https://www.youtube.com/watch?v=zo_-AsAMMQ0)

During class assignment: Residents will recall near miss/adverse event that they experienced during clinical care (or watch safety video). They will complete Ishikawa Fishbone diagrams of systems issues involved in the near miss/adverse event. These diagrams will be completed and turned in.

**Lecture 2 – Quality Assessment**

Topic:

Introduction to UCM Center for Quality and quality analytics ( -10min)

Introduction to UCM Quality metrics and goals (-10min)

Residents will review the Institute for Medicine (IOM) 6 aims for improvement and discuss concepts of good quality measures ( -10 min)

Resident will review publically available hospital comparison data on UCM and surrounding hospitals (10 min)

Residents will chose 3 measures relevant to their specialty and write brief paragraph about how they anticipate this will affect them over their training (10 min)

Objectives:

1. Residents will name leaders and purpose of UCM Center for Quality
2. Resident will know how to access UCM external QI metrics publically available
3. Resident will understand UCM Quality Analytics – Center for Quality structure
4. Resident will demonstrate knowledge of IOM 6 aims for improvement – STEEP
5. Residents will demonstrate knowledge of structure/process/outcome measurement types
6. Resident will demonstrate ability to access Hospitalcompare.gov website ( pediatric session will also include USNWR website)
7. Resident will demonstrate ability to access Center of Quality data on the Hospital Website

For Reference Only:

1. [http://intranet.uchicago.edu/quality/SCIP\\_files/page0001.htm](http://intranet.uchicago.edu/quality/SCIP_files/page0001.htm)
2. <http://www.healthcarereportcard.illinois.gov/hospitals/view/101195>
3. <http://site.acsnsqip.org/program-specifics/nsqip-history/>
4. <http://www.cdc.gov/stltpublichealth/performance/Definitions.html>
5. <http://home.uchospitals.edu/portal/dt?JSPTabContainer.setSelected=TabQualitySafety&last=false&TabQualitySafety.setSelected=hiddenPageQualitySafety>

During class assignment:

1. Review the hospital compare website data.
2. Choose 2 measures relevant to your specialty
3. For each measure you chose – write how you anticipate this will impact you over your residency

### **Lecture 3 –Quality Improvement**

Topic:

UChicago Quality Improvement– structure, development and implementation of annual goals (- 20 min)

CLER and Milestones quality-related objectives (5 min)

Introduction to AIM and PDSA (10 min)

Small Group Activity: PDSA worksheet to address a dashboard measure needing improvement (10 min)

Post test (10 min)

Objectives: By the end of the session, residents will be able to:

1. Describe how institutional quality goals are developed and who is involved in that process.
2. Describe the role of the Chief Medical Officer as it relates to Quality.
3. Name at least three of UCMC's quality goals for this fiscal year.
4. Provide examples of quality related objectives defined by the CLER and the Milestones projects of the ACGME.
5. Describe the components of a well written AIM statement.
6. Define the four steps of a PDSA cycle and what continuous improvement means.
7. Discuss a specific example of a PDSA cycle that has been implemented at UCMC in the past fiscal year.
8. Review a current quality dashboard and complete a PDSA worksheet to address an area requiring improvement.

For Reference Only:

During Class assignment: Complete IHI model for improvement PDSA worksheet for one theoretical QI project using data from UCM Quality Priorities

GME QI/PS Curriculum Homework #1  
Name: \_\_\_\_\_  
Specialty: \_\_\_\_\_  
Year in Training: \_\_\_\_\_  
Date: \_\_\_\_\_

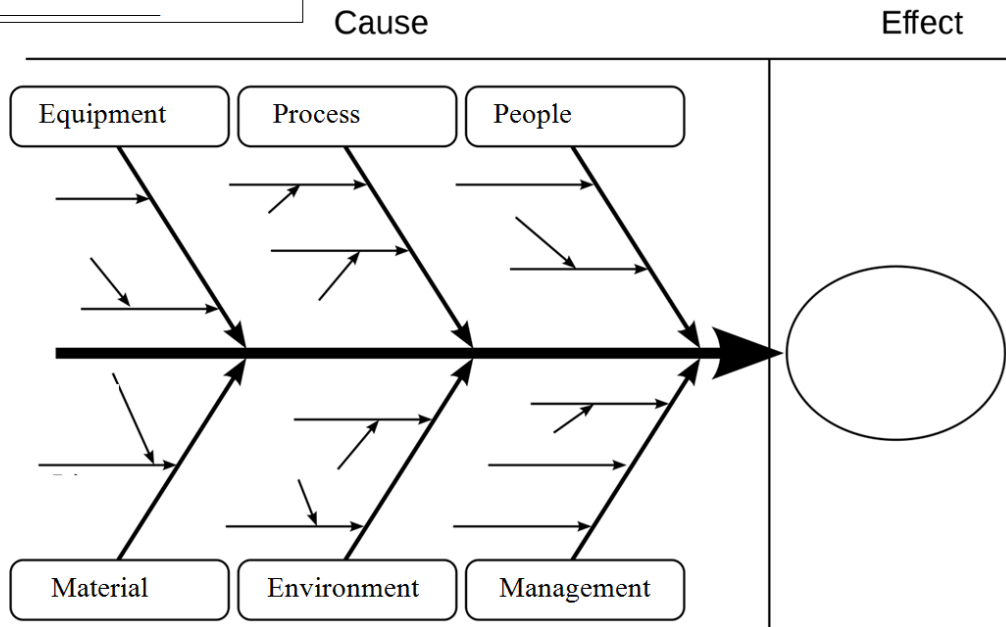

|                                                                                                               |
|---------------------------------------------------------------------------------------------------------------|
| GME QI/PS Curriculum Homework #2<br>Name: _____<br>Specialty: _____<br>Year in Training: _____<br>Date: _____ |
|---------------------------------------------------------------------------------------------------------------|

Graduate Medical Education Quality Improvement and Patient Safety Lecture 2 – Quality Assessment

During class assignment:

1. Review <https://www.medicare.gov/hospitalcompare/search.html>
2. Choose 3 hospitals to compare. Which 3 hospitals did you compare?
  - a. Hospital 1 = \_\_\_\_\_
  - b. Hospital 2 = \_\_\_\_\_
  - c. Hospital 3 = \_\_\_\_\_
3. Chose 3 measures relevant to your specialty.
4. Measure #1
  - a. List measure and the results of the comparison  
\_\_\_\_\_  
\_\_\_\_\_  
\_\_\_\_\_
  - b. How will this measure impact you over your training?  
\_\_\_\_\_  
\_\_\_\_\_
  - c. What type of measure did you chose? Structure/Process/Outcome (Circle one)
  - d. Does this measure fall into one of the 6 IOM categories (Circle One)  
Safe    Timely    Effective    Efficient    Equitable    Patient-centered
5. Measure #2
  - a. List measure and the results of the comparison  
\_\_\_\_\_  
\_\_\_\_\_  
\_\_\_\_\_
  - b. How will this measure impact you over your training?  
\_\_\_\_\_  
\_\_\_\_\_
  - c. What type of measure did you chose? Structure/Process/Outcome (Circle one)
  - d. Does this measure fall into one of the 6 IOM categories (Circle One)  
Safe    Timely    Effective    Efficient    Equitable    Patient-centered

GME QI/PS Curriculum Homework #3  
Names: \_\_\_\_\_, \_\_\_\_\_, \_\_\_\_\_  
Specialty: \_\_\_\_\_  
Year in Training: \_\_\_\_\_  
Date: \_\_\_\_\_

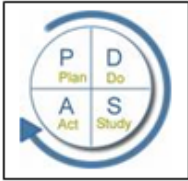

# PDSA Worksheet

**Please pick one measurement from the Hospital Scorecard to answer the first three questions on the worksheet.**

- 1. AIM** - What are we trying to accomplish? SSMART aim: Specific, Stretch, Measurable, Achievable, Relevant, and Timely.
  
  
  
  
  
  
  
  
  
  
- 2. Measures** – How will we know that a change is an improvement?
  
  
  
  
  
  
  
  
  
  
- 3. Propose interventions** – What changes can we make to improve this process?  
What do you expect to see as a result?

**Team Members:** Who do you need to be part of the intervention?

- |          |          |
|----------|----------|
| 1. _____ | 5. _____ |
| 2. _____ | 6. _____ |
| 3. _____ | 7. _____ |
| 4. _____ | 8. _____ |

### **Bibliography**

1. Nasca TJ, Philibert I, Brigham T, Flynn TC. The next GME accreditation system—rationale and benefits. *N Engl J Med*. 2012;366:1051–1056
2. Weiss KB, Bagian JP, Nasca TJ. The clinical learning environment: The foundation of graduate medical education. *JAMA*. 2013;309:1687–1688
3. Kohn KT, Corrigan JM, Donaldson MS. *To Err Is Human: Building a Safer Health System*. 2000 Washington, DC National Academy Press
4. Institute of Medicine. . *Crossing the Quality Chasm: A New Health System for the 21st Century*. 2001 Washington, DC National Academy Press
5. Oyler J, Vinci L, Arora V, Johnson J. “Teaching Internal Medicine Residents to Sustain Their Improvement through the Quality Assessment and Improvement Curriculum”, *Journal of General Internal Medicine*, 2011 Feb;26(2):221-5. Epub 2010 Nov 4. PMID: 21053089
6. Vinci L, Oyler J, Johnson J, Arora V, “Effect of a Quality Improvement Curriculum on Resident Knowledge and Skills in Improvement”, *Quality and Safety in Health Care*, 2010 Aug;19(4):351-4. Epub 2010 May 31. PMID: 20513793
7. Laiteerapong N, Keh CE, Naylor KB, Yang VL, Vinci LM, Oyler JL, Arora VM. “A Resident-Led Quality Improvement Initiative to Improve Obesity Screening,” *Am J Med Qual*. 2011 Mar 29. PMID: 21447835
8. Oyler J, Vinci L, Arora V, Johnson J. “Teaching Internal Medicine Residents Quality Improvement Techniques using the ABIM's Practice Improvement Modules. *Journal of General Internal Medicine*. July 2008, 23(7): 921-926. PMID: 18449612
9. Association of American Medical Colleges. . *Teaching for Quality: Integrating Quality Improvement and Patient Safety Across the Continuum of Medical Education*.  
<https://www.aamc.org/initiatives/cei/te4q/366184/te4qreportarticle.html> Published 2013. Accessed Jan 15, 2015
10. Ackerly DC, Parekh A, Stein D. A framework for career paths in health systems improvement. *Acad Med*. 2013;88:56–60
11. Fleischut PM, Faggiani SL, Evans AS, et al. 2011 John M. Eisenberg Patient Safety and Quality Awards. The effect of a novel Housestaff Quality Council on quality and patient safety. *Innovation in patient safety and quality at the local level*. *Jt Comm J Qual Patient Saf*. 2012;38:311–317
12. Tudiver F, Click IA, Ward P, Basden JA. Evaluation of a quality improvement curriculum for family medicine residents. *Fam Med*; 2013 Jan;45(1):19-25.
13. Reardon CL, Ogrinc G, Walaszek A. A didactic and experiential quality improvement curriculum for psychiatry residents. *J Grad Med Educ*; 2011 Dec;3(4):562-5.
14. Tomolo AM, Lawrence RH, Watts B, Augustine S, Aron DC, Singh MK. Pilot study evaluating a practice-based learning and improvement curriculum focusing on the development of system-level quality improvement skills. *J Grad Med Educ*; 2011 Mar;3(1):49-58.



15. Majka AJ, Cook KE, Lynch SL, Garovic VD, Ghosh AK, West CP, Feyereisn WL, Paat JJ, Williams BJ, Hale CW, Botz CT, Phul AE, Mueller PS. Teaching quality essentials: the effectiveness of a team-based quality improvement curriculum in a tertiary health care institution. *Am J Med Qual*; 2013 May-Jun;28(3):214-9.

16. Carey WA, Colby CE. Educating fellows in practice-based learning and improvement and systems-based practice: The value of quality improvement in clinical practice. *J Crit Care*; 2013 Feb;28(1):112.e1-5.

17. Nabors C, Peterson SJ, Weems R, Forman L, Mumtaz A, Goldberg R, Kar K, Borges JA, Doctor I, Lubben O, Pherwani N, Frishman WH. A multidisciplinary approach for teaching systems-based practice to internal medicine residents. *J Grad Med Educ*; 2011 Mar;3(1):75-80.

18. Rodrigue C, Seoane L, Gala RB, Piazza J, Amedee RG. Ochsner J; Developing a Practical and Sustainable Faculty Development Program With a Focus on Teaching Quality Improvement and Patient Safety: An Alliance for Independent Academic Medical Centers National Initiative III Project. 2012;12(4):338-43.

19. Arbuckle MR, Weinberg M, Cabaniss DL, Kistler SC, Isaacs AJ, Sederer LI, Essock SM. Training psychiatry residents in quality improvement: an integrated, year-long curriculum. *Acad Psychiatry*; 2013 Jan 1;37(1):42-5.

20. Hayashi J, Christmas C, Durso SC. Educational outcomes from a novel house call curriculum for internal medicine residents: report of a 3-year experience. *J Am Geriatr Soc*; 2011 Jul;59(7):1340-9.

21. Sarwar A, Eisenberg RL, Boiselle PM, Siewert B, Kruskal JB. Improving resident education in quality improvement: role for a resident quality improvement director. *Acad Radiol*; 2013 Apr;20(4):500-5.

22. Drucker AM, Cavalcanti RB, Wong BM, Walsh SR. Teaching dermatology to internal medicine residents: needs assessment survey and possible directions. *J Cutan Med Surg*; 2013 Jan-Feb;17(1):39-45.

23. Formal quality improvement curriculum and DMAIC method results in interdisciplinary collaboration and process improvement in renal transplant patients. Leaphart CL, Gonwa TA, Mai ML, Prendergast MB, Wadei HM, Tepas JJ 3rd, Taner CB. *J Surg Res*; 2012 Sep;177(1):7-13.

24. Pensa M, Frew P, Gelmon SB. Integrating improvement learning into a family medicine residency curriculum. *Fam Med*; 2013 Jun;45(6):409-16.

25. Fiebach NH, Rao D, Hamm ME. A curriculum in health systems and public health for internal medicine residents. *Am J Prev Med*; 2011 Oct;41(4 Suppl 3):S264-9.

26. Wittich CM, Reed DA, Drefahl MM, McDonald FS, Thomas KG, Halvorsen AJ, Beckman TJ. Residents' reflections on quality improvement: temporal stability and associations with preventability of adverse patient events. *Acad Med*; 2011 Jun;86(6):737-41.
