# Supplementary material
Source: PubMed Central journal article supplement (PMC6194875)
Supplement: JGMED1800060Suppl3.pdf [file JGMED1800060Suppl3.pdf]

1 Results of a Pre/Post test for Graduate Medical Education QI/PS Curriculum

| ...                                                                        | PGY-1 Pre (%)<br>n = 112 | PGY-1 Post (%) n = 112 | PGY-1 Pre vs Post |
|----------------------------------------------------------------------------|--------------------------|------------------------|-------------------|
| Total score<br>(out of 23)                                                 | 10.1 (44%)               | 13.2 (57%)             | p < 0.01          |
| Patient Safety content area score<br>(out of 4)                            | 1.8 (45%)                | 2.0 (50%)              | p = 0.05          |
| Quality Assessment content area score<br>(out of 10)                       | 5.1 (51%)                | 5.6 (56%)              | p < 0.01          |
| Quality Improvement content area score<br>(out of 9)                       | 3.2 (36%)                | 5.4 (60%)              | p < 0.01          |
| Identify patient safety events that require a<br>Root Cause Analysis (RCA) | 48 (43%)                 | 60 (54%)               | p = 0.05          |
| Identify a non-preventable adverse drug<br>reactions                       | 49 (44%)                 | 62 (55%)               | p = 0.04          |
| Name the Institute for Medicine 6 core aims for<br>healthcare (STEEP)      | 48 (43%)                 | 80 (71%)               | p < 0.01          |
| Identify Hospital Compare website features                                 | 49 (44%)                 | 40 (36%)               | p = 0.19          |
| Identify hospital Center for Quality structure                             | 38 (34%)                 | 56 (50%)               | p < 0.01          |
| Name Plan-Do-Study-Act (PDSA) components                                   | 43 (38%)                 | 62 (55%)               | p < 0.01          |
| Identify components of a SMART aim statement                               | 66 (59%)                 | 78 (70%)               | p = 0.05          |
| Name the Chief Medical Officer                                             | 41 (37%)                 | 75 (67%)               | p < 0.01          |
| Name the Vice President for Risk/Patient Safety                            | 14 (13%)                 | 51 (46%)               | p < 0.01          |
| Name the Chief Quality Officer                                             | 16 (14%)                 | 59 (53%)               | p < 0.01          |
| Name the Dean of Biological Sciences Division                              | 67 (60%)                 | 82 (73%)               | p < 0.01          |
| Name the Hospital President                                                | 53 (47%)                 | 87 (78%)               | p < 0.01          |
| Name the Director of Quality Analytics                                     | 16 (14%)                 | 41 (37%)               | p < 0.01          |
| Name the Director of Risk Management and<br>Patient Safety                 | 8 (7%)                   | 29 (26%)               | p < 0.01          |
